# Supplementary material for: A model for decoding the life cycle of granular avalanches in a rotating drum
Source: Springer Nature journal article supplement (doi:10.1007/s11440-017-0609-2), 2017-12-04
Supplement: MOESM1 [file 11440_2017_609_MOESM1_ESM.docx]

SUPPLEMENTARY MATERIAL

**A model for decoding the life-cycle of granular avalanches in a rotating drum**

Eloïse Marteau, José E. Andrade*

*Division of Engineering & Applied Science,*

*California Institute of Technology, Pasadena, CA 91125, USA*

*Corresponding author: jandrade@caltech.edu

As a supplementary material, we are providing a movie of a typical avalanche event and of the corresponding evolution of the inclination angle as a function of time. This movie is slowed down 23 times compared to the actual speed.
